# Supplementary material for: Physically crosslinked fluorosilicone elastomers obtained by self- assembly and template polycondensation of tailored building blocks
Source: Royal Society of Chemistry journal article supplement (doi:10.1039/c0jm01519a), 2010-01-01
Supplement: c0jm01519a.pdf [file c0jm01519a.pdf]

## Supporting information for

### Physically-Crosslinked Fluorosilicone Elastomers Obtained by Self-Assembly and Template Polycondensation of Tailored Building Blocks

By Claire Longuet, Amédée Ratsimihety, Sébastien André, Gilles Boutevin, Francine Guida-Pietrasanta, Brigitte Decamps, Michel Ramonda, Christine Joly-Duhamel, Bernard Boutevin and François Ganachaud\*

#### Table of contents

Figure S1: SEC analysis of the initial product of hydrosilylation (**1** in scheme 3, see experimental part in the main text), and removal of  $n=1$  by distillation, before hydrolysis step (see text for details).

Figure S2: Strain-stress curves on unstretched samples from **2'**.

Figure S3:  $^1\text{H}$  NMR spectra of **1** end-capped with vinyltrimethylchlorosilane ( $\text{DP}_x = 1.6$ ).

Figure S4: Zoom on the TEM photograph of a cluster in material **1'**.

Figure S5: Detailed AFM analysis on the surface of sample **1'**.

Figure S6: DSC traces of sample **1** using three rising temperature ramps (from top to bottom)..

Figure S7: DSC trace of sample **2**.

Figure S8: Triple detection SEC in toluene of dissolved materials **1'** (above) and **2'** (below).

Figure S9:  $G'$  (full symbols) and  $G''$  (open symbols) versus temperature for material **2'**.

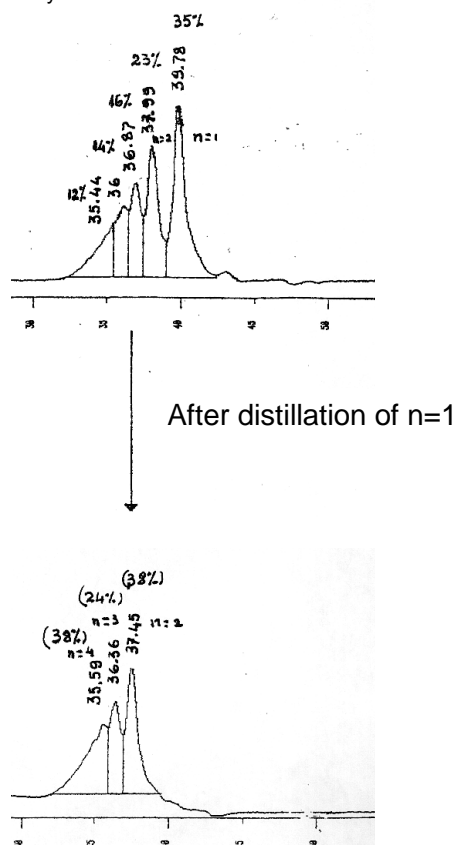

Figure S1: SEC analysis of the initial product of hydrosilylation (**I** in scheme 3, see experimental part in the main text), and removal of  $n=1$  by distillation, before hydrolysis step (see text for details).

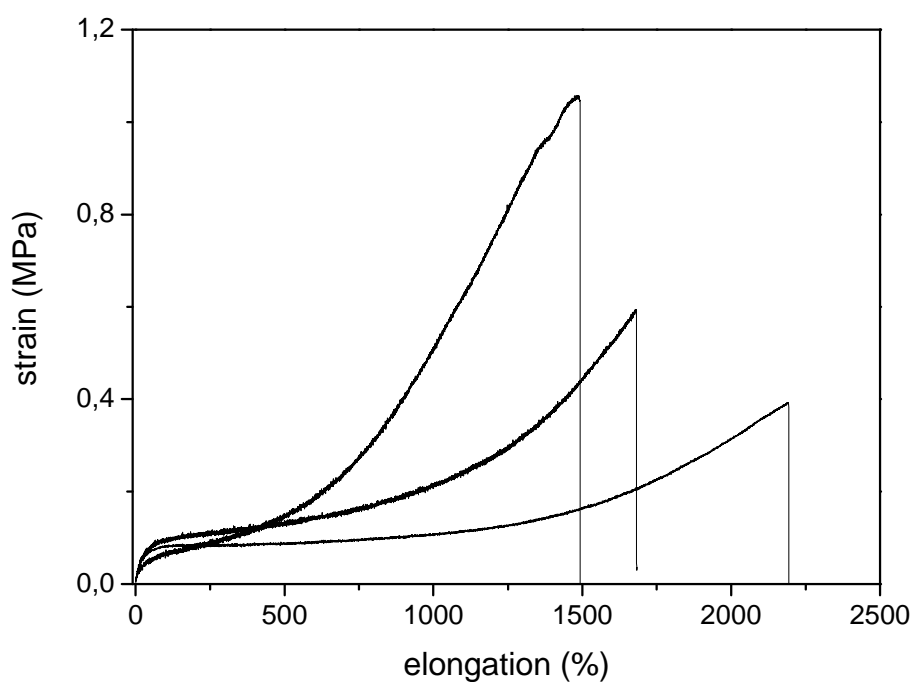

Figure S2: Strain-stress curves on three different unstretched test samples of **2'**.

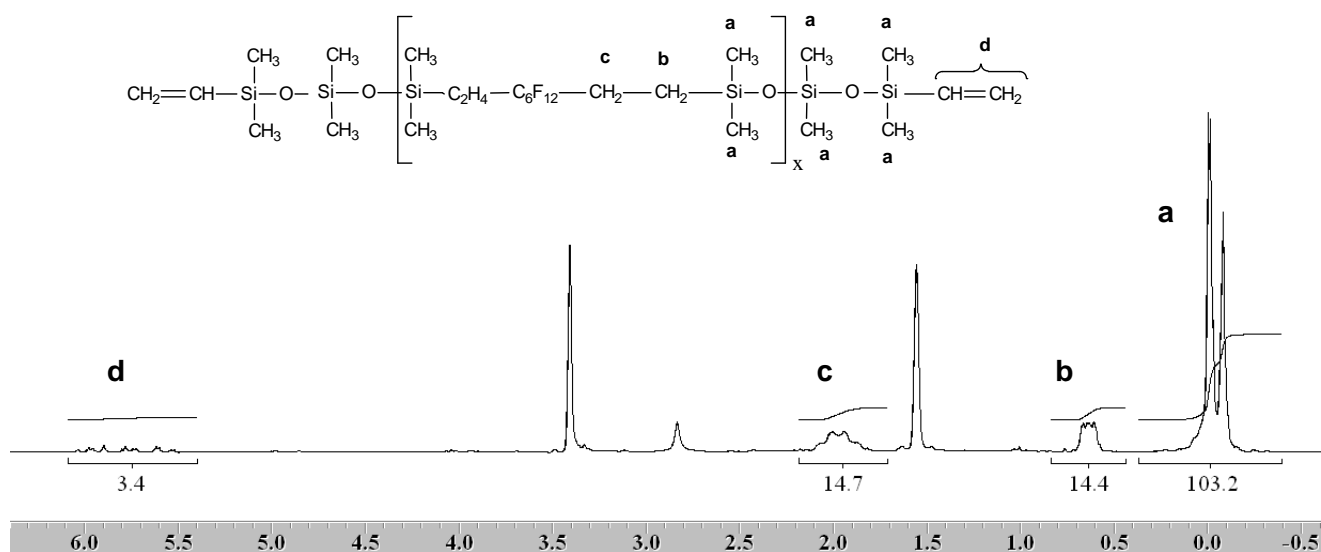

Figure S3:  $^1\text{H}$  NMR spectra of **1** end-capped with vinyltrimethylchlorosilane ( $\text{DP}_x = 1.6$ ).

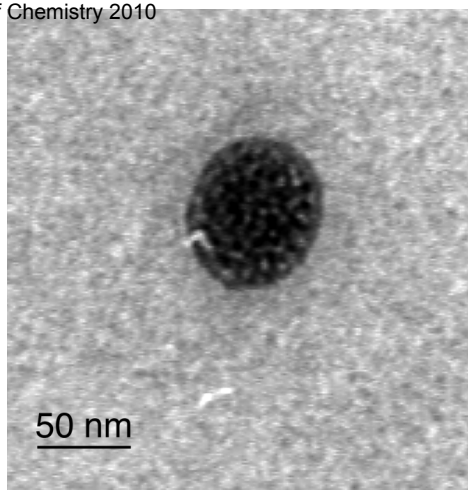

Figure S4: Zoom on the TEM photograph of a cluster in material 1'.

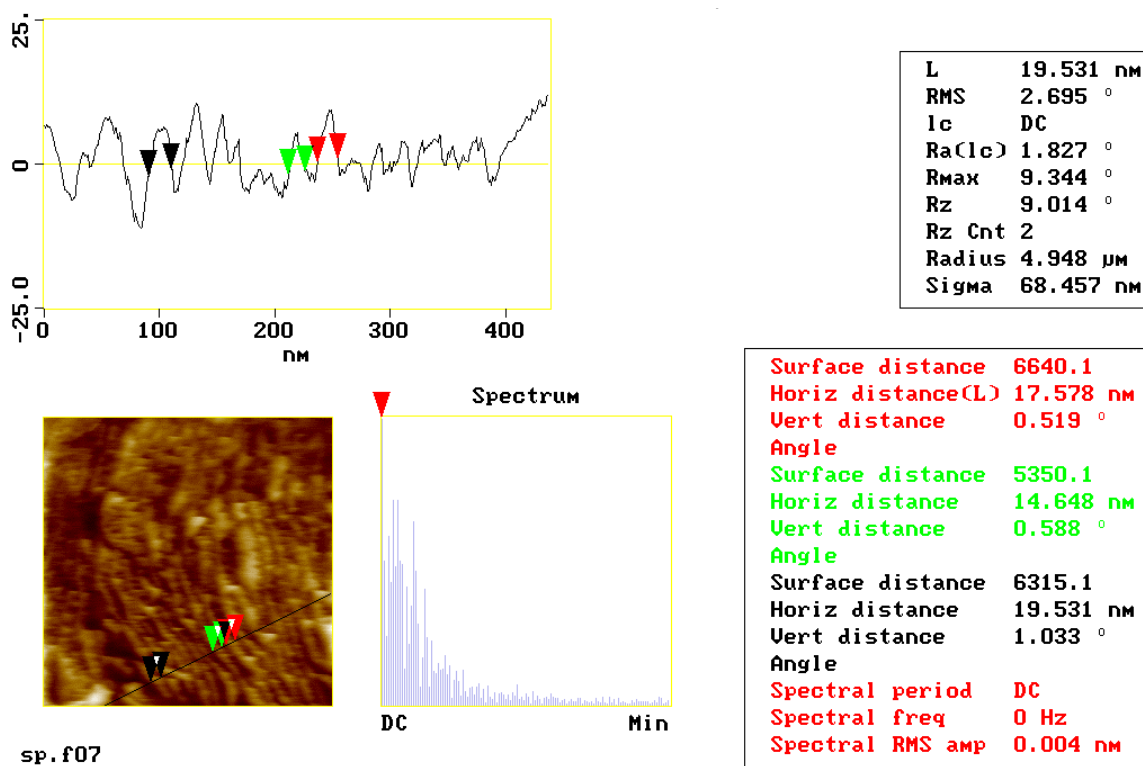

Figure S5: Detailed AFM analysis on the surface of sample 1'.

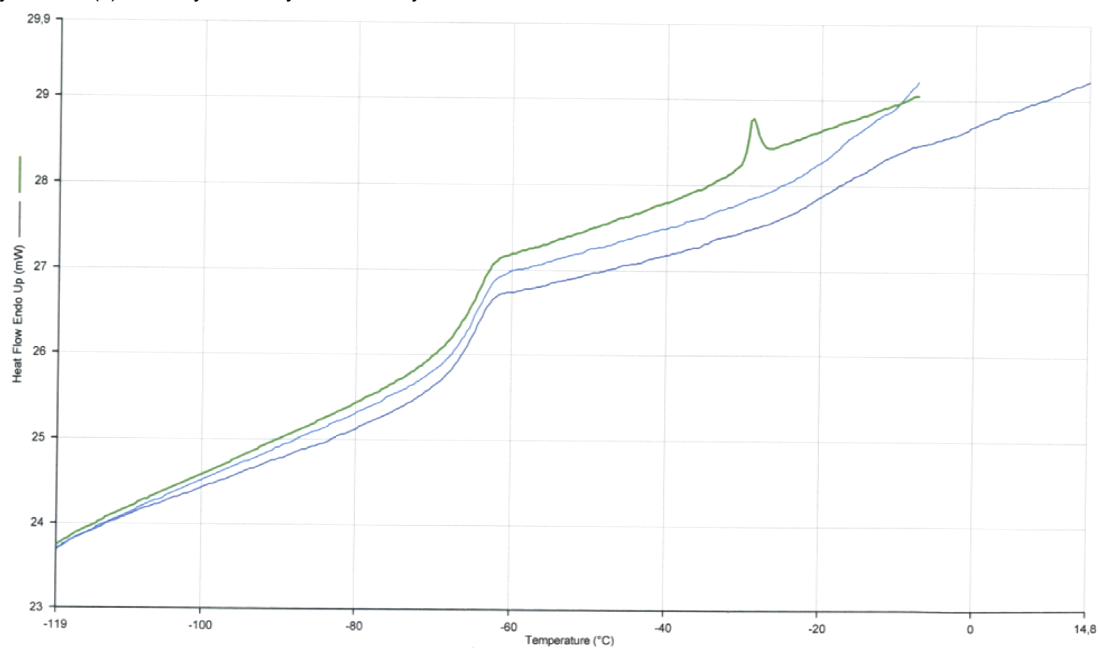

Figure S6: DSC traces of sample 1 using three rising temperature ramps (from top to bottom).

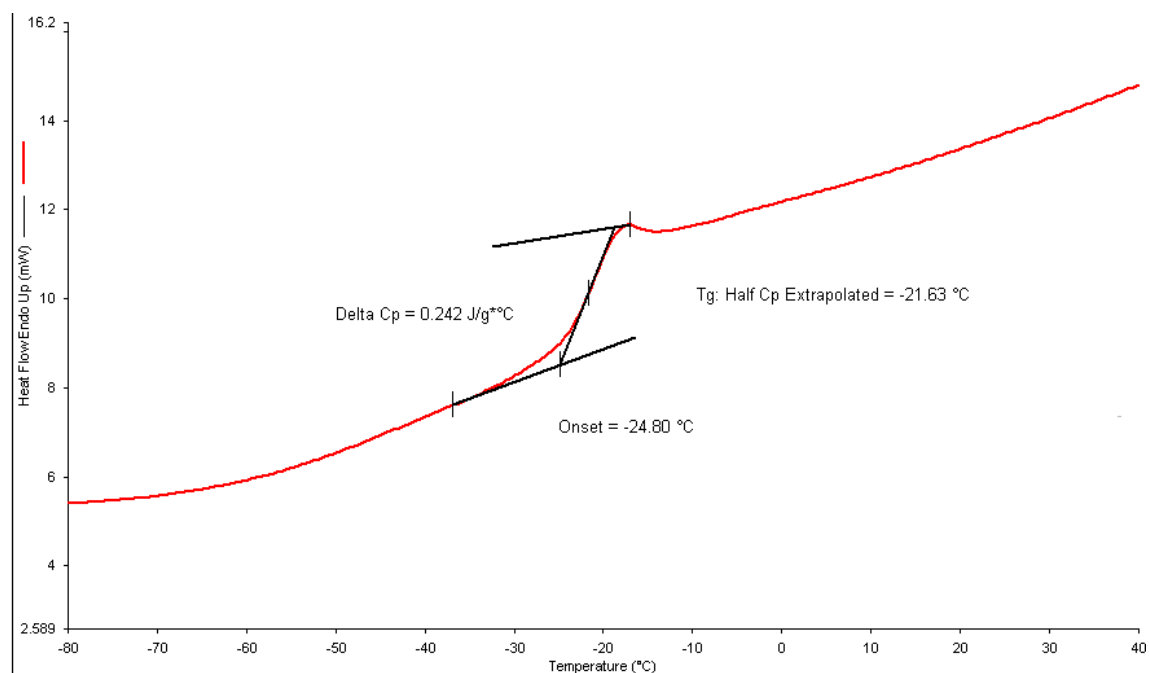

Figure S7: DSC trace of sample 2.

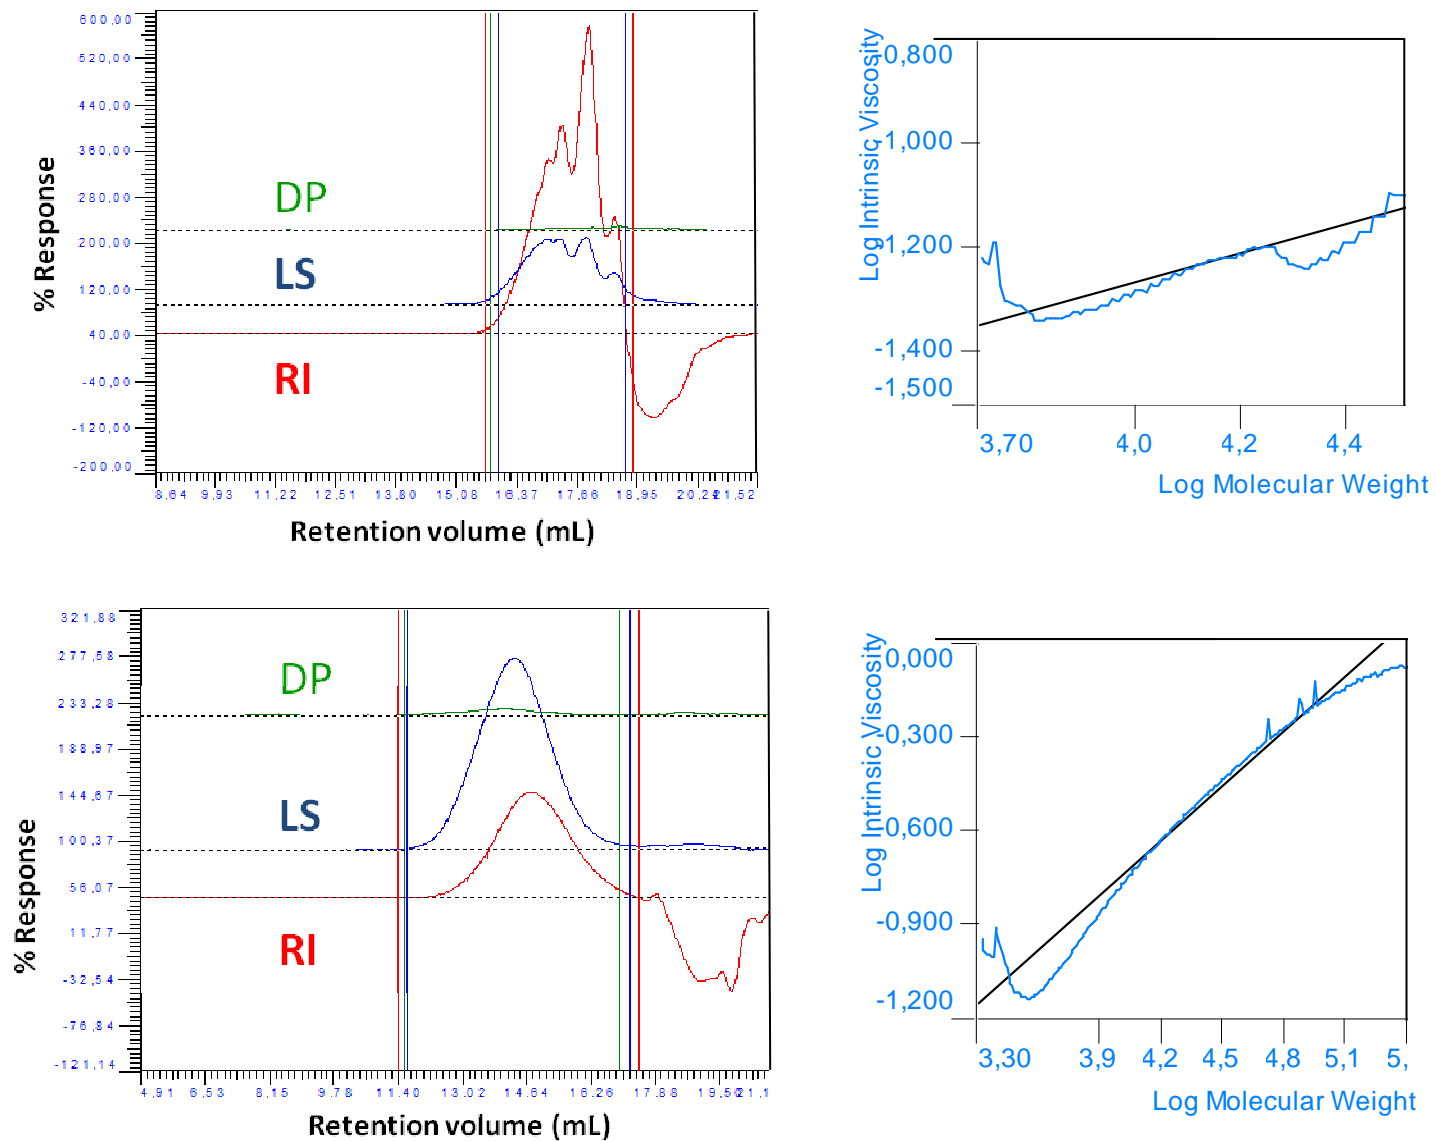

Figure S8: Triple detection SEC in toluene of dissolved materials **1'** (above) and **2'** (below).

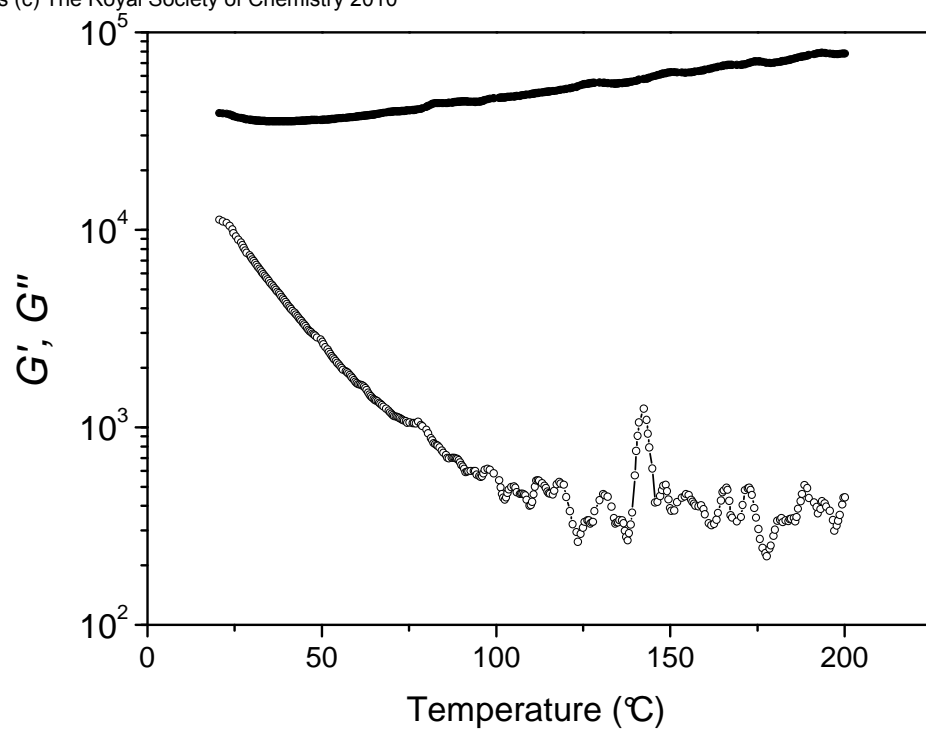

Figure S9:  $G'$  (full symbols) and  $G''$  (open symbols) versus temperature for material **2'**.
